# Supplementary material for: Effect of different-sized spherical gold nanoparticles grown layer by layer on the sensitivity of an immunochromatographic assay
Source: Royal Society of Chemistry journal article supplement (doi:10.1039/c6ra03695c), 2016-01-01
Supplement: c6ra03695c1.pdf [file c6ra03695c1.pdf]

1 **Supporting information**

2 **Effect of different-sized spherical gold nanoparticles grown layer by**  
3 **layer on the sensitivity of immunochromatographic assay**

4 Juan Li<sup>a,b</sup>, Hong Duan <sup>a,b</sup>, Peng Xu<sup>a,b</sup>, Xiaolin Huang<sup>a,b</sup>, Yonghua Xiong<sup>\*a,b</sup>

5 <sup>a</sup> State Key Laboratory of Food Science and Technology, Nanchang University,  
6 Nanchang 330047, P. R. China;

7 <sup>b</sup> Jiangxi-OAI Joint Research Institute, Nanchang University, Nanchang 330047, P. R.  
8 China;

9 \*Correspondence to:

10 **Dr. Yonghua Xiong** State Key Laboratory of Food Science and Technology, and

11 Jiangxi-OAI Joint Research Institute, Nanchang University

12 Address: 235 Nanjing East Road, Nanchang 330047, P.R. China

13 Phone: +0086-791-8833-4578. Fax: +0086-791-8833-3708.

14 E-mail: yhxiongchen@163.com.

16 **1. Optimization of anti-OTA ascitic fluid-saturated labeled concentrations with**  
17 **different-sized AuNSs.**

18 Anti-OTA ascitic fluids were used to label four sizes of AuNSs directly. The pH  
19 of AuNS solutions were adjusted by adding  $K_2CO_3$  (0.2 mol/L) to a final pH of 6.5 for  
20 labeling anti-OTA ascitic fluids. Anti-OTA ascitic fluid-labeled, different-sized  
21 AuNSs were optimized by dropping a series of concentrations of anti-OTA ascitic  
22 fluids to 1 mL of pH adjusted AuNS solutions. The saturated labeled amounts of anti-  
23 OTA ascitic fluids on different-sized AuNSs were evaluated by recording the  $OD_T$   
24 value after running the same amount of AuNS probes on strips. Fig. S1 indicates that  
25 the  $OD_T$  value of the strip increases sharply with increasing ascitic fluid content and  
26 then gradually declines with further increase in ascitic fluids. We speculate that an  
27 excessive density of mAbs on the surface of AuNSs would lead to steric hindrance of  
28 the mAbs and, in consequence, bad color on the test line. Thus, the saturated labeled  
29 amounts of anti-OTA ascitic fluids were 14.21  $\mu\text{g}$  per mL of 20 nm conventional  
30 AuNS solution on AuNSs (1.0 nmol/L, purple line). The saturated labeled amounts of  
31 anti-OTA ascitic fluids for 60 (blue line), 100 (red line), and 180 nm (green line)  
32 AuNS solution (10 pmol/L) were 5.62, 11.84, and 25.64  $\mu\text{g}$ , respectively.

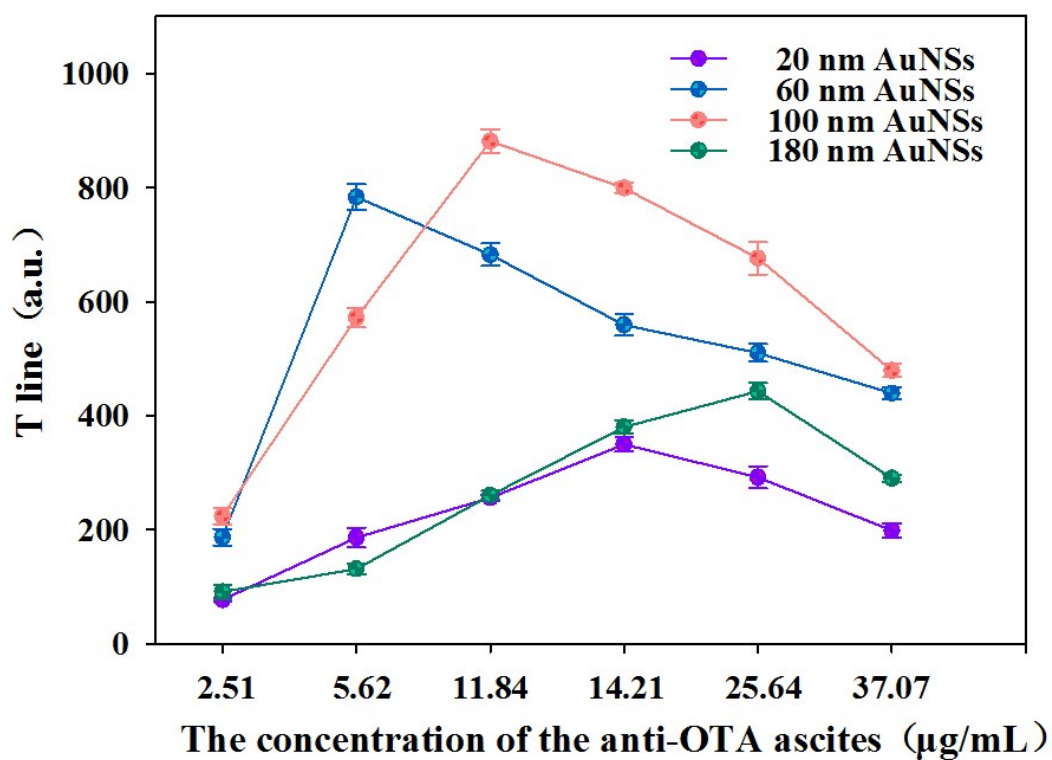

33

34 **Figure S1.** Preparation and characterization of AuNS probes. Optimized saturated

35 labeled amounts of anti-OTA ascitic fluids on AuNSs.

37 **2. Kinetic screening of different-sized AuNS probes and OTA-BSA artificial**  
38 **antigen**

39 Binding curves for the reported  $K_D$  values for different-sized AuNS probes and OTA-  
40 BSA artificial antigen were obtained from bio-layer interferometry experiments as  
41 previously described.  $K_D$  values are summarized in Table 1 in the main body of the  
42 manuscript.

43 **A. 20 nm AuNS probes,  $K_D = 6.004 \times 10^{-11}$  M**

44 **B. 60 nm AuNS probes,  $K_D = 4.721 \times 10^{-11}$  M**

45 **C. 100 nm AuNS probes,  $K_D = 4.424 \times 10^{-11}$  M**

46 **D. 180 nm AuNS probes,  $K_D = 6.435 \times 10^{-12}$  M**

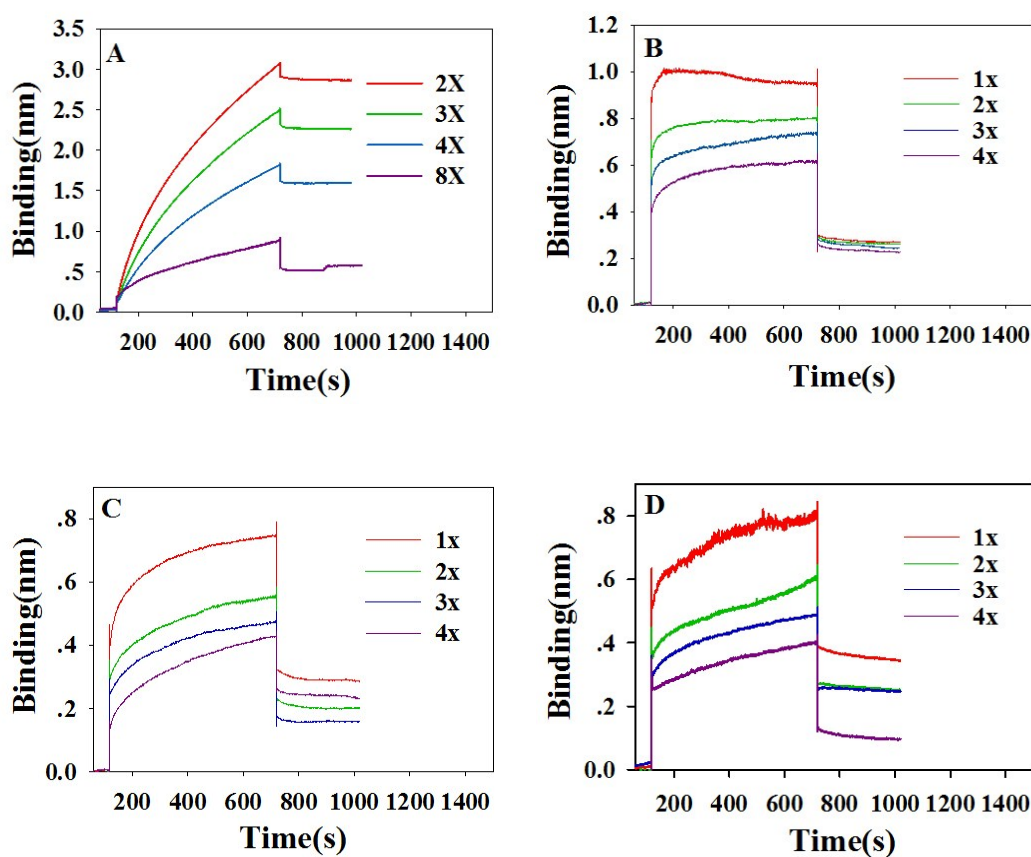

49 **Figure S2.** Kinetic screening of different-sized AuNS probes and OTA-BSA artificial

50 antigen using ForteBio Streptavidin (SA) biosensors. A. 20 nm; B. 60 nm; C. 100 nm;  
51 D. 180 nm. In addition, “ $Nx$ ” and “ $nx$ ” represent the dilution ratio of AuNS probes.  $2X$   
52 = 1.174 nmol/L,  $3X = 0.587$  nmol/L,  $4X = 0.391$  nmol/L,  $8X = 0.294$  nmol/L;  $1x =$   
53 11.74 pmol/L,  $2x = 5.87$  pmol/L,  $3x = 3.91$  pmol/L,  $4x = 2.94$  pmol/L.

55 **3. Comparison of color intensity of different-sized AuNS-based ICA strip**

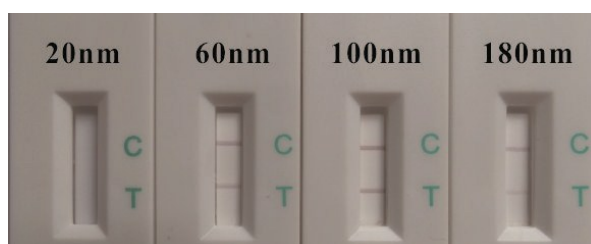

56

57 **Figure S3.** Stereogram of strips with 0.235 fmol of different-sized AuNS probes in  
58 each strip.

59 **4. Cut-off values of different-sized AuNS-based ICAS (wet method)**

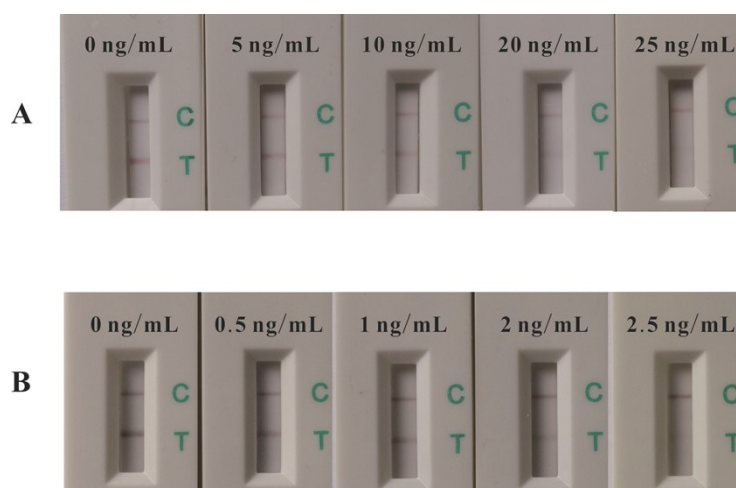

60

61 **Figure S4.** Physical pictures of two-sized AuNS (**A.** Conventional 20 nm AuNSs; **B.**  
62 100 nm AuNSs) based ICAs for the detection of different OTA concentrations.

64 **Table S1.** Optimization of the parameters of the 20 nm AuNS-based strip<sup>#</sup>.

| No        | Concentration of OTA-BSA (mg/mL) | Amount of AuNSs-probe in each strip (fmol) | Optical density of T-line (a.u) | Optical density of C-line (a.u) | Value of T/C        | Inhibition rate (%) |
|-----------|----------------------------------|--------------------------------------------|---------------------------------|---------------------------------|---------------------|---------------------|
| 1         | 1.99                             | 7.05                                       | 824.1 ± 10.2                    | 525.7 ± 3.93                    | 1.567 ± 0.07        | 7.40 ± 1.11         |
| 2         | 1.59                             | 7.05                                       | 686.3 ± 3.81                    | 528.7 ± 4.57                    | 1.298 ± 0.15        | 3.62 ± 0.17         |
| 3         | 1.32                             | 7.05                                       | 580.5 ± 2.91                    | 535.0 ± 9.11                    | 1.085 ± 0.27        | 10.23 ± 2.21        |
| 4         | 1.99                             | 4.7                                        | 593.2 ± 6.46                    | 330.6 ± 11.0                    | 1.794 ± 0.14        | 30.22 ± 1.93        |
| 5         | 1.59                             | 4.7                                        | 450.2 ± 6.95                    | 336.2 ± 2.91                    | 1.339 ± 0.10        | 29.06 ± 1.21        |
| <b>6*</b> | <b>1.32</b>                      | <b>4.7</b>                                 | <b>416.1 ± 3.30</b>             | <b>353.9 ± 4.80</b>             | <b>1.176 ± 0.05</b> | <b>44.29 ± 0.80</b> |
| 7         | 1.99                             | 2.35                                       | 486.4 ± 11.3                    | 262.9 ± 3.91                    | 1.850 ± 0.08        | 36.81 ± 4.81        |
| 8         | 1.59                             | 2.35                                       | 344.7 ± 9.11                    | 276.0 ± 7.25                    | 1.249 ± 0.18        | 18.65 ± 3.39        |
| 9         | 1.32                             | 2.35                                       | 313.6 ± 2.25                    | 252.0 ± 9.02                    | 1.244 ± 0.11        | 40.09 ± 4.16        |

65 Notice: \* The optimal combinations.

66

67
